# Supplementary material for: Improving the Performance of Somatic Mutation Identification by Recovering Circulating Tumor DNA Mutations
Source: Oxford University Press journal article supplement (doi:10.1158/0008-5472.can-15-3457), 2016-08-17
Supplement: 00085472can153457-sup-159846_2_supp_3548268_w9k2tw.xlsx [file 00085472can153457-sup-159846_2_supp_3548268_w9k2tw.xlsx]

## Sheet: Supplementary Table 1
Supplementary Table 1: Summary of normal control sample type in a set of whole exome sequencing data in TCGA
whole-exome sequencing data sample information was retrieved at https://cghub.ucsc.edu/ (-BROWSER) Applied filter(s): Analyte Type: DNA (D) Study: TCGA (phs000178) Sample Type: Blood Derived Normal (10 OR TARGET_10), Bone Marrow Normal (14 OR TARGET_14), Buccal Cell Normal (12 OR TARGET_12), EBV Immortalized Normal (13 OR TARGET_13), Fibroblast Normal (TARGET_15), Primary Solid Tumor (01 OR TARGE…
		Normal control
Cancer Type	Total number of sample	Blood derived normal only	Blood + other	Other
GBM	316	314	0	2
OV	67	62	0	5
LUAD	514	366	45	103
LUSC	491	270	43	178
PRAD	498	392	48	58
UCEC	459	422	12	25
BLCA	412	375	17	20
TGCT	150	150	0	0
ESCA	184	120	6	58
PAAD	184	148	5	31
KIRP	288	200	31	57
LIHC	375	290	35	50
CESC	305	297	3	5
SARC	255	233	4	18
BRCA	829	715	32	82
THYM	123	108	2	13
MESO	83	82	0	1
COAD	323	248	35	40
STAD	441	353	42	46
SKCM	104	104	0	0
CHOL	51	31	13	7
KIRC	519	95	21	403
THCA	496	398	30	68
HNSC	510	435	59	16
READ	101	90	5	6
LGG	516	514	0	2
DLBC	48	44	0	4
KICH	66	9	0	57
UCS	57	51	0	6
ACC	92	87	0	5
PCPG	179	174	3	2
UVM	80	80	0	0
Pan-cancer	9116	7257	491	1368
