# Supplementary material for: Improving the Performance of Somatic Mutation Identification by Recovering Circulating Tumor DNA Mutations
Source: Oxford University Press journal article supplement (doi:10.1158/0008-5472.can-15-3457), 2016-08-17
Supplement: 00085472can153457-sup-159846_2_supp_3548269_99k2t9.xlsx [file 00085472can153457-sup-159846_2_supp_3548269_99k2t9.xlsx]

## Sheet: newcoverage2
Supplementary Table 2: information of 1000G samples used in data simulation
Id	MinCoverage	ctDNA_percentage(%)
NA06989	97.793374	0.308
NA06994	95.394963	2.749
NA07000	83.15589	1.594
NA07037	133.788659654092	1.039
NA07048	128.049116416369	0.308
NA07347	96.253549	0.103
NA10847	101.007362	1.183
NA10851	87.692203	2.356
NA11829	81.564335	0.554
NA11830	86.418205	0.688
NA11832	88.332684	1.653
NA11840	99.070352	2.235
NA11881	102.094569	2.333
NA11892	109.341662	1.515
NA11893	134.30622830987	1.016
NA11894	112.824048006441	1.535
NA11920	106.254769335501	0.081
NA11931	115.461216783151	2.058
NA11932	126.385262687691	2.995
NA11933	139.486846895888	1.347
NA11994	87.232481	0.890
NA12005	81.508608	2.784
NA12006	86.878083	0.310
NA12043	104.977679	2.290
NA12044	87.011318	1.020
NA12045	81.044505	0.129
NA12058	85.605665	0.369
NA12144	83.647237	1.936
NA12154	84.300314	1.996
NA12155	83.854996	1.076
NA12234	86.076228	2.854
NA12249	92.798802	2.694
NA12272	94.455488	2.534
NA12273	80.397006	1.483
NA12275	89.268952	0.289
NA12282	91.7267717514187	0.080
NA12283	81.591851	0.464
NA12286	100.354072	2.862
NA12287	97.6186745078303	1.700
NA12347	119.412969	1.147
NA12348	117.327087	0.867
NA12383	116.840179	0.402
NA12399	126.784247623291	1.639
NA12400	90.0568293267861	0.998
NA12413	109.560166762676	2.455
NA12414	111.32227	2.934
NA12489	82.282771	0.342
NA12546	113.124732705764	0.426
NA12716	99.597625	1.784
NA12717	98.659327	0.734
NA12718	104.273525	1.539
NA12749	109.407199078705	0.395
NA12750	110.124257088173	0.181
NA12751	96.750904	0.571
NA12760	104.566074	1.589
NA12775	98.9481792412698	0.587
NA12776	137.58293768391	0.895
NA12777	112.686403663829	1.661
NA12778	106.337620432023	1.233
NA12812	81.169187	2.967
NA12813	119.868957	2.727
NA12827	138.270766169298	1.436
NA12828	125.374093858991	0.718
NA12829	122.227131829131	2.577
NA12878	97.15247	0.292
NA12890	117.202893223148	2.901
