# Supplementary material for: Improving the Performance of Somatic Mutation Identification by Recovering Circulating Tumor DNA Mutations
Source: Oxford University Press journal article supplement (doi:10.1158/0008-5472.can-15-3457), 2016-08-17
Supplement: 00085472can153457-sup-159846_2_supp_3548271_29k2tp.xlsx [file 00085472can153457-sup-159846_2_supp_3548271_29k2tp.xlsx]

## Sheet: Supplementary Table 5
Supplementary Table 5: Performance summary of somatic mutation calling with Mutect, Mutect+cmDetect, Varscan, Varscan+cmDetect with different filters
Mutect
Max allele frequency in blood	Max supporting read count in blood	TMutect	TPMutect	TPMutect low	TPMutect high	FPMutect	FPMutect low	FPMutect high	FNMutect	FNMutect low	FNMutect high	RecallMutect	RecallMutect low	RecallMutect high	PrecisMutect	PrecisMutect low	PrecisMutect high	FscoreMutect	FscoreMutect low	FscoreMutect high
0.15	10	15086	10803	10693	10911	4283	4174	4392	1665	1557	1775	0.866	0.858	0.875	0.716	0.709	0.723	0.784	0.776	0.792
0.15	9	14871	10801	10693	10907	4070	3963	4177	1667	1561	1775	0.866	0.858	0.875	0.726	0.719	0.734	0.79	0.782	0.798
0.15	8	14607	10794	10688	10897	3813	3709	3918	1674	1571	1780	0.866	0.857	0.874	0.739	0.732	0.746	0.797	0.79	0.805
0.14	10	14414	10796	10692	10897	3618	3516	3721	1672	1571	1776	0.866	0.858	0.874	0.749	0.742	0.756	0.803	0.796	0.811
0.14	9	14247	10795	10693	10894	3452	3352	3553	1673	1574	1775	0.866	0.858	0.874	0.758	0.751	0.765	0.808	0.801	0.816
0.14	8	14038	10788	10688	10885	3250	3152	3349	1680	1583	1780	0.865	0.857	0.873	0.768	0.761	0.775	0.814	0.806	0.821
0.13	10	13797	10793	10696	10887	3004	2909	3100	1675	1581	1772	0.866	0.858	0.873	0.782	0.775	0.789	0.822	0.815	0.829
0.13	9	13671	10792	10697	10885	2879	2785	2973	1676	1583	1771	0.866	0.858	0.873	0.789	0.783	0.796	0.826	0.819	0.833
0.13	8	13523	10785	10692	10876	2738	2646	2830	1683	1592	1776	0.865	0.858	0.872	0.798	0.791	0.804	0.83	0.823	0.837
0.12	10	13305	10791	10701	10879	2514	2425	2603	1677	1589	1767	0.865	0.858	0.873	0.811	0.804	0.818	0.837	0.83	0.844
0.12	9	13224	10790	10701	10876	2434	2347	2522	1678	1592	1767	0.865	0.858	0.872	0.816	0.809	0.823	0.84	0.833	0.847
0.12	8	13114	10783	10695	10868	2331	2245	2418	1685	1600	1773	0.865	0.858	0.872	0.822	0.816	0.829	0.843	0.836	0.85
0.11	10	12815	10784	10701	10864	2031	1950	2113	1684	1604	1767	0.865	0.858	0.871	0.842	0.835	0.848	0.853	0.847	0.859
0.11	9	12763	10783	10701	10862	1980	1900	2061	1685	1606	1767	0.865	0.858	0.871	0.845	0.839	0.851	0.855	0.848	0.861
0.11	8	12686	10777	10696	10855	1909	1830	1989	1691	1613	1772	0.864	0.858	0.871	0.85	0.843	0.856	0.857	0.85	0.863
0.1	10	12477	10780	10703	10854	1697	1622	1773	1688	1614	1765	0.865	0.858	0.871	0.864	0.858	0.87	0.864	0.858	0.87
0.1	9	12448	10779	10702	10852	1669	1595	1745	1689	1616	1766	0.865	0.858	0.87	0.866	0.86	0.872	0.865	0.859	0.871
0.1	8	12403	10774	10698	10847	1629	1555	1704	1694	1621	1770	0.864	0.858	0.87	0.869	0.863	0.875	0.866	0.86	0.872
0.09	10	11954	10764	10698	10827	1190	1126	1255	1704	1641	1770	0.863	0.858	0.868	0.9	0.895	0.906	0.882	0.876	0.887
0.09	9	11941	10763	10697	10826	1178	1114	1243	1705	1642	1771	0.863	0.858	0.868	0.901	0.896	0.907	0.882	0.877	0.887
0.09	8	11917	10759	10693	10821	1158	1095	1223	1709	1647	1775	0.863	0.858	0.868	0.903	0.897	0.908	0.882	0.877	0.888
0.08	10	11704	10749	10689	10806	955	897	1014	1719	1662	1779	0.862	0.857	0.867	0.918	0.913	0.923	0.889	0.884	0.894
0.08	9	11695	10748	10688	10805	947	889	1006	1720	1663	1780	0.862	0.857	0.867	0.919	0.914	0.924	0.89	0.885	0.894
0.08	8	11681	10744	10684	10800	937	880	996	1724	1668	1784	0.862	0.857	0.866	0.92	0.915	0.925	0.89	0.885	0.894
0.07	10	11440	10723	10670	10773	717	666	769	1745	1695	1798	0.86	0.856	0.864	0.937	0.933	0.942	0.897	0.893	0.901
0.07	9	11436	10722	10669	10771	714	664	766	1746	1697	1799	0.86	0.856	0.864	0.938	0.933	0.942	0.897	0.893	0.901
0.07	8	11429	10718	10665	10767	711	661	763	1750	1701	1803	0.86	0.855	0.864	0.938	0.933	0.942	0.897	0.893	0.901
0.06	10	11278	10685	10636	10730	593	547	641	1783	1738	1832	0.857	0.853	0.861	0.947	0.943	0.951	0.9	0.896	0.904
0.06	9	11277	10685	10636	10730	592	546	640	1783	1738	1832	0.857	0.853	0.861	0.948	0.943	0.952	0.9	0.896	0.904
0.06	8	11273	10682	10633	10727	591	545	639	1786	1741	1835	0.857	0.853	0.86	0.948	0.943	0.952	0.9	0.896	0.904
0.05	10	11122	10622	10577	10663	500	458	544	1846	1805	1891	0.852	0.848	0.855	0.955	0.951	0.959	0.901	0.897	0.904
0.05	9	11122	10622	10577	10663	500	458	544	1846	1805	1891	0.852	0.848	0.855	0.955	0.951	0.959	0.901	0.897	0.904
0.05	8	11120	10621	10576	10662	499	457	543	1847	1806	1892	0.852	0.848	0.855	0.955	0.951	0.959	0.901	0.897	0.904
0.05	7	11119	10620	10575	10661	499	457	543	1848	1807	1893	0.852	0.848	0.855	0.955	0.951	0.959	0.9	0.897	0.904
0.05	6	11114	10615	10570	10656	499	457	543	1853	1812	1898	0.851	0.848	0.855	0.955	0.951	0.959	0.9	0.896	0.904
0.05	5	11108	10611	10566	10652	497	455	541	1857	1816	1902	0.851	0.847	0.854	0.955	0.951	0.959	0.9	0.896	0.904
0.05	4	11098	10602	10557	10643	496	454	540	1866	1825	1911	0.85	0.847	0.854	0.955	0.951	0.959	0.9	0.896	0.903
0.05	3	11059	10566	10521	10607	493	451	537	1902	1861	1947	0.847	0.844	0.851	0.955	0.951	0.959	0.898	0.894	0.902
0.05	2	10944	10463	10419	10504	481	439	524	2005	1964	2049	0.839	0.836	0.842	0.956	0.952	0.96	0.894	0.89	0.897
0.04	10	10938	10509	10467	10547	429	390	470	1959	1921	2001	0.843	0.84	0.846	0.961	0.957	0.964	0.898	0.894	0.901
0.04	9	10938	10509	10467	10547	429	390	470	1959	1921	2001	0.843	0.84	0.846	0.961	0.957	0.964	0.898	0.894	0.901
0.04	8	10937	10508	10466	10546	429	390	470	1960	1922	2002	0.843	0.839	0.846	0.961	0.957	0.964	0.898	0.894	0.901
0.04	7	10936	10507	10465	10545	429	390	470	1961	1923	2003	0.843	0.839	0.846	0.961	0.957	0.964	0.898	0.894	0.901
0.04	6	10932	10503	10461	10541	429	390	470	1965	1927	2007	0.842	0.839	0.845	0.961	0.957	0.964	0.898	0.894	0.901
0.04	5	10931	10502	10460	10540	429	390	470	1966	1928	2008	0.842	0.839	0.845	0.961	0.957	0.964	0.898	0.894	0.901
0.04	4	10924	10495	10453	10533	429	390	470	1973	1935	2015	0.842	0.838	0.845	0.961	0.957	0.964	0.897	0.894	0.901
0.04	3	10894	10466	10424	10504	428	389	469	2002	1964	2044	0.839	0.836	0.842	0.961	0.957	0.964	0.896	0.892	0.899
0.04	2	10804	10380	10338	10418	424	385	465	2088	2050	2130	0.833	0.829	0.836	0.961	0.957	0.964	0.892	0.888	0.895
0.03	10	10612	10218	10177	10255	394	356	434	2250	2213	2291	0.82	0.816	0.823	0.963	0.959	0.966	0.885	0.882	0.889
0.03	9	10612	10218	10177	10255	394	356	434	2250	2213	2291	0.82	0.816	0.823	0.963	0.959	0.966	0.885	0.882	0.889
0.03	8	10612	10218	10177	10255	394	356	434	2250	2213	2291	0.82	0.816	0.823	0.963	0.959	0.966	0.885	0.882	0.889
0.03	7	10611	10217	10176	10254	394	356	434	2251	2214	2292	0.819	0.816	0.822	0.963	0.959	0.966	0.885	0.882	0.889
0.03	6	10609	10215	10174	10252	394	356	434	2253	2216	2294	0.819	0.816	0.822	0.963	0.959	0.966	0.885	0.882	0.889
0.03	5	10609	10215	10174	10252	394	356	434	2253	2216	2294	0.819	0.816	0.822	0.963	0.959	0.966	0.885	0.882	0.889
0.03	4	10605	10211	10170	10248	394	356	434	2257	2220	2298	0.819	0.816	0.822	0.963	0.959	0.966	0.885	0.882	0.888
0.03	3	10588	10195	10155	10232	393	355	432	2273	2236	2313	0.818	0.814	0.821	0.963	0.959	0.966	0.884	0.881	0.888
0.05	1	10538	10080	10037	10120	458	417	500	2388	2348	2431	0.808	0.805	0.812	0.957	0.953	0.96	0.876	0.873	0.88
0.03	2	10524	10133	10093	10170	391	353	430	2335	2298	2375	0.813	0.81	0.816	0.963	0.959	0.966	0.881	0.878	0.885
0.04	1	10450	10034	9992	10072	416	377	457	2434	2396	2476	0.805	0.801	0.808	0.96	0.956	0.964	0.876	0.872	0.879
0.03	1	10274	9886	9846	9923	388	350	427	2582	2545	2622	0.793	0.79	0.796	0.962	0.958	0.966	0.869	0.866	0.873
0.02	7	10109	9730	9690	9766	379	342	418	2738	2702	2778	0.78	0.777	0.783	0.963	0.959	0.966	0.862	0.858	0.865
0.02	6	10109	9730	9690	9766	379	342	418	2738	2702	2778	0.78	0.777	0.783	0.963	0.959	0.966	0.862	0.858	0.865
0.02	5	10109	9730	9690	9766	379	342	418	2738	2702	2778	0.78	0.777	0.783	0.963	0.959	0.966	0.862	0.858	0.865
0.02	4	10106	9727	9687	9763	379	342	418	2741	2705	2781	0.78	0.777	0.783	0.962	0.959	0.966	0.862	0.858	0.865
0.02	3	10098	9719	9679	9755	379	342	418	2749	2713	2789	0.78	0.776	0.782	0.962	0.959	0.966	0.861	0.858	0.865
0.02	2	10069	9691	9651	9727	378	341	417	2777	2741	2817	0.777	0.774	0.78	0.962	0.959	0.966	0.86	0.856	0.863
0.02	1	9924	9548	9508	9584	376	339	415	2920	2884	2960	0.766	0.763	0.769	0.962	0.958	0.966	0.853	0.849	0.856
0.01	3	9134	8768	8729	8803	366	330	404	3700	3665	3739	0.703	0.7	0.706	0.96	0.956	0.964	0.812	0.808	0.815
0.01	2	9133	8768	8729	8803	365	329	403	3700	3665	3739	0.703	0.7	0.706	0.96	0.956	0.964	0.812	0.808	0.815
0.01	1	9117	8752	8713	8787	365	329	403	3716	3681	3755	0.702	0.699	0.705	0.96	0.956	0.964	0.811	0.807	0.814
0	1	8669	8306	8267	8341	363	327	401	4162	4127	4201	0.666	0.663	0.669	0.958	0.954	0.962	0.786	0.782	0.789
Mutect + cmDetect
Max allele frequency in blood	Max supporting read count in blood	TMutect+cmDetect	TPMutect+cmDetect	TPMutect+cmDetect low	TPMutect+cmDetect high	FPMutect+cmDetect	FPMutect+cmDetect low	FPMutect+cmDetect high	FNMutect+cmDetect	FNMutect+cmDetect low	FNMutect+cmDetect high	RecallMutect+cmDetect	RecallMutect+cmDetect low	RecallMutect+cmDetect high	PrecisMutect+cmDetect	PrecisMutect+cmDetect low	PrecisMutect+cmDetect high	FscoreMutect+cmDetect	FscoreMutect+cmDetect low	FscoreMutect+cmDetect high
0.15	10	15177	10894	10784	11002	4283	4174	4392	1574	1466	1684	0.874	0.865	0.882	0.718	0.711	0.725	0.788	0.78	0.796
0.15	9	14962	10892	10784	10998	4070	3963	4177	1576	1470	1684	0.874	0.865	0.882	0.728	0.721	0.735	0.794	0.786	0.802
0.15	8	14699	10886	10780	10989	3813	3709	3918	1582	1479	1688	0.873	0.865	0.881	0.741	0.733	0.748	0.801	0.794	0.809
0.14	10	14505	10887	10783	10988	3618	3516	3721	1581	1480	1685	0.873	0.865	0.881	0.751	0.743	0.758	0.807	0.8	0.815
0.14	9	14338	10886	10784	10986	3452	3351	3553	1582	1482	1684	0.873	0.865	0.881	0.759	0.752	0.766	0.812	0.805	0.82
0.14	8	14130	10880	10780	10977	3250	3152	3349	1588	1491	1688	0.873	0.865	0.88	0.77	0.763	0.777	0.818	0.811	0.825
0.13	10	13888	10884	10787	10978	3004	2909	3100	1584	1490	1681	0.873	0.865	0.88	0.784	0.777	0.791	0.826	0.819	0.833
0.13	9	13762	10883	10788	10976	2879	2785	2973	1585	1492	1680	0.873	0.865	0.88	0.791	0.784	0.798	0.83	0.823	0.837
0.13	8	13615	10877	10783	10968	2738	2646	2831	1591	1500	1685	0.872	0.865	0.88	0.799	0.792	0.806	0.834	0.827	0.841
0.12	10	13396	10882	10792	10970	2514	2425	2603	1586	1498	1676	0.873	0.866	0.88	0.812	0.806	0.819	0.841	0.835	0.848
0.12	9	13315	10881	10792	10967	2434	2347	2522	1587	1501	1676	0.873	0.866	0.88	0.817	0.811	0.824	0.844	0.837	0.851
0.12	8	13206	10875	10787	10960	2331	2245	2418	1593	1508	1681	0.872	0.865	0.879	0.823	0.817	0.83	0.847	0.84	0.854
0.11	10	12907	10876	10793	10956	2031	1950	2113	1592	1512	1675	0.872	0.866	0.879	0.843	0.836	0.849	0.857	0.851	0.864
0.11	9	12855	10875	10793	10954	1980	1900	2061	1593	1514	1675	0.872	0.866	0.879	0.846	0.84	0.852	0.859	0.852	0.865
0.11	8	12779	10870	10789	10948	1909	1830	1989	1598	1520	1679	0.872	0.865	0.878	0.851	0.844	0.857	0.861	0.855	0.867
0.1	10	12569	10872	10795	10946	1697	1622	1773	1596	1522	1673	0.872	0.866	0.878	0.865	0.859	0.871	0.868	0.862	0.874
0.1	9	12540	10871	10794	10944	1669	1595	1745	1597	1524	1674	0.872	0.866	0.878	0.867	0.861	0.873	0.869	0.863	0.875
0.1	8	12496	10867	10791	10940	1629	1555	1704	1601	1528	1677	0.872	0.865	0.877	0.87	0.864	0.876	0.871	0.865	0.877
0.09	10	12046	10856	10790	10919	1190	1126	1255	1612	1549	1678	0.871	0.865	0.876	0.901	0.896	0.907	0.886	0.88	0.891
0.09	9	12033	10855	10789	10918	1178	1114	1243	1613	1550	1679	0.871	0.865	0.876	0.902	0.897	0.907	0.886	0.881	0.891
0.09	8	12010	10852	10786	10914	1158	1095	1223	1616	1554	1682	0.87	0.865	0.875	0.904	0.898	0.909	0.887	0.881	0.892
0.08	10	11797	10842	10782	10899	955	897	1014	1626	1569	1686	0.87	0.865	0.874	0.919	0.914	0.924	0.894	0.889	0.898
0.08	9	11788	10841	10781	10898	947	889	1006	1627	1570	1687	0.87	0.865	0.874	0.92	0.915	0.925	0.894	0.889	0.899
0.08	8	11775	10838	10778	10894	937	880	996	1630	1574	1690	0.869	0.864	0.874	0.92	0.915	0.925	0.894	0.889	0.899
0.07	10	11539	10822	10769	10872	717	666	769	1646	1596	1699	0.868	0.864	0.872	0.938	0.933	0.942	0.902	0.897	0.906
0.07	9	11535	10821	10768	10870	714	664	766	1647	1598	1700	0.868	0.864	0.872	0.938	0.934	0.942	0.902	0.897	0.906
0.07	8	11529	10818	10765	10867	711	661	763	1650	1601	1703	0.868	0.863	0.872	0.938	0.934	0.943	0.902	0.897	0.906
0.06	10	11384	10791	10742	10836	593	547	641	1677	1632	1726	0.865	0.862	0.869	0.948	0.944	0.952	0.905	0.901	0.909
0.06	9	11383	10791	10742	10836	592	546	640	1677	1632	1726	0.865	0.862	0.869	0.948	0.944	0.952	0.905	0.901	0.909
0.06	8	11380	10789	10740	10834	591	545	639	1679	1634	1728	0.865	0.861	0.869	0.948	0.944	0.952	0.905	0.901	0.909
0.05	10	11253	10753	10708	10795	500	457	544	1715	1673	1760	0.862	0.859	0.866	0.956	0.952	0.959	0.907	0.903	0.91
0.05	9	11253	10753	10708	10795	500	457	544	1715	1673	1760	0.862	0.859	0.866	0.956	0.952	0.959	0.907	0.903	0.91
0.05	8	11251	10752	10707	10793	499	457	543	1716	1675	1761	0.862	0.859	0.866	0.956	0.952	0.959	0.907	0.903	0.91
0.05	7	11250	10751	10706	10792	499	457	543	1717	1676	1762	0.862	0.859	0.866	0.956	0.952	0.959	0.907	0.903	0.91
0.05	6	11249	10750	10705	10791	499	457	543	1718	1677	1763	0.862	0.859	0.865	0.956	0.952	0.959	0.907	0.903	0.91
0.05	5	11243	10746	10701	10787	497	455	541	1722	1681	1767	0.862	0.858	0.865	0.956	0.952	0.96	0.906	0.903	0.91
0.05	4	11236	10740	10695	10781	496	454	540	1728	1687	1773	0.861	0.858	0.865	0.956	0.952	0.96	0.906	0.902	0.91
0.05	3	11220	10727	10682	10768	493	451	537	1741	1700	1786	0.86	0.857	0.864	0.956	0.952	0.96	0.906	0.902	0.909
0.05	2	11180	10699	10655	10740	481	439	524	1769	1728	1813	0.858	0.855	0.861	0.957	0.953	0.961	0.905	0.901	0.908
0.04	10	11105	10676	10634	10714	429	390	470	1792	1754	1834	0.856	0.853	0.859	0.961	0.958	0.965	0.906	0.902	0.909
0.04	9	11105	10676	10634	10714	429	390	470	1792	1754	1834	0.856	0.853	0.859	0.961	0.958	0.965	0.906	0.902	0.909
0.04	8	11104	10675	10633	10713	429	390	470	1793	1755	1835	0.856	0.853	0.859	0.961	0.958	0.965	0.906	0.902	0.909
0.04	7	11103	10674	10632	10712	429	390	470	1794	1756	1836	0.856	0.853	0.859	0.961	0.958	0.965	0.906	0.902	0.909
0.04	6	11102	10673	10631	10711	429	390	470	1795	1757	1837	0.856	0.853	0.859	0.961	0.958	0.965	0.906	0.902	0.909
0.04	5	11101	10672	10630	10710	429	390	470	1796	1758	1838	0.856	0.853	0.859	0.961	0.958	0.965	0.906	0.902	0.909
0.04	4	11096	10667	10625	10705	429	390	470	1801	1763	1843	0.856	0.852	0.859	0.961	0.958	0.965	0.905	0.902	0.909
0.04	3	11086	10658	10616	10696	428	389	469	1810	1772	1852	0.855	0.851	0.858	0.961	0.958	0.965	0.905	0.901	0.908
0.04	2	11061	10637	10595	10675	424	385	465	1831	1793	1873	0.853	0.85	0.856	0.962	0.958	0.965	0.904	0.901	0.907
0.03	10	10914	10520	10479	10557	394	356	434	1948	1911	1989	0.844	0.84	0.847	0.964	0.96	0.967	0.9	0.896	0.903
0.03	9	10914	10520	10479	10557	394	356	434	1948	1911	1989	0.844	0.84	0.847	0.964	0.96	0.967	0.9	0.896	0.903
0.03	8	10914	10520	10479	10557	394	356	434	1948	1911	1989	0.844	0.84	0.847	0.964	0.96	0.967	0.9	0.896	0.903
0.03	7	10913	10519	10478	10556	394	356	434	1949	1912	1990	0.844	0.84	0.847	0.964	0.96	0.967	0.9	0.896	0.903
0.03	6	10912	10518	10477	10555	394	356	434	1950	1913	1991	0.844	0.84	0.847	0.964	0.96	0.967	0.9	0.896	0.903
0.03	5	10912	10518	10477	10555	394	356	434	1950	1913	1991	0.844	0.84	0.847	0.964	0.96	0.967	0.9	0.896	0.903
0.03	4	10910	10516	10475	10553	394	356	434	1952	1915	1993	0.843	0.84	0.846	0.964	0.96	0.967	0.9	0.896	0.903
0.03	3	10904	10511	10470	10548	393	355	433	1957	1920	1998	0.843	0.84	0.846	0.964	0.96	0.967	0.899	0.896	0.903
0.05	1	11037	10579	10536	10619	458	417	500	1889	1849	1932	0.848	0.845	0.852	0.959	0.955	0.962	0.9	0.897	0.904
0.03	2	10884	10493	10453	10530	391	353	430	1975	1938	2015	0.842	0.838	0.845	0.964	0.96	0.968	0.899	0.895	0.902
0.04	1	10952	10536	10494	10574	416	377	457	1932	1894	1974	0.845	0.842	0.848	0.962	0.958	0.966	0.9	0.896	0.903
0.03	1	10812	10424	10384	10461	388	350	427	2044	2007	2084	0.836	0.833	0.839	0.964	0.961	0.968	0.896	0.892	0.899
0.02	7	10649	10270	10230	10306	379	342	418	2198	2162	2238	0.824	0.821	0.827	0.964	0.961	0.968	0.889	0.885	0.892
0.02	6	10649	10270	10230	10306	379	342	418	2198	2162	2238	0.824	0.821	0.827	0.964	0.961	0.968	0.889	0.885	0.892
0.02	5	10649	10270	10230	10306	379	342	418	2198	2162	2238	0.824	0.821	0.827	0.964	0.961	0.968	0.889	0.885	0.892
0.02	4	10647	10268	10228	10304	379	342	418	2200	2164	2240	0.824	0.82	0.826	0.964	0.961	0.968	0.888	0.885	0.892
0.02	3	10643	10264	10224	10300	379	342	418	2204	2168	2244	0.823	0.82	0.826	0.964	0.961	0.968	0.888	0.885	0.891
0.02	2	10634	10256	10216	10292	378	341	417	2212	2176	2252	0.823	0.819	0.825	0.964	0.961	0.968	0.888	0.884	0.891
0.02	1	10591	10215	10175	10251	376	339	415	2253	2217	2293	0.819	0.816	0.822	0.964	0.961	0.968	0.886	0.883	0.889
0.01	3	10160	9794	9755	9829	366	330	404	2674	2639	2713	0.786	0.782	0.788	0.964	0.96	0.968	0.866	0.862	0.869
0.01	2	10159	9794	9755	9829	365	329	403	2674	2639	2713	0.786	0.782	0.788	0.964	0.96	0.968	0.866	0.862	0.869
0.01	1	10152	9787	9748	9822	365	329	403	2681	2646	2720	0.785	0.782	0.788	0.964	0.96	0.968	0.865	0.862	0.868
0	1	9888	9525	9486	9560	363	327	401	2943	2908	2982	0.764	0.761	0.767	0.963	0.959	0.967	0.852	0.849	0.855
Varscan
Max allele frequency in blood	Max supporting read count in blood	TVarscan	TPVarscan	TPVarscan low	TPVarscan high	FPVarscan	FPVarscan low	FPVarscan high	FNVarscan	FNVarscan low	FNVarscan high	RecallVarscan	RecallVarscan low	RecallVarscan high	PrecisVarscan	PrecisVarscan low	PrecisVarscan high	FscoreVarscan	FscoreVarscan low	FscoreVarscan high
0.15	10	12354	11138	11071	11202	1216	1151	1282	1330	1266	1397	0.893	0.888	0.898	0.902	0.896	0.907	0.897	0.892	0.903
0.15	9	12346	11137	11070	11201	1209	1144	1275	1331	1267	1398	0.893	0.888	0.898	0.902	0.897	0.907	0.898	0.892	0.903
0.15	8	12331	11132	11065	11195	1199	1135	1265	1336	1273	1403	0.893	0.887	0.898	0.903	0.897	0.908	0.898	0.892	0.903
0.14	10	12354	11138	11071	11202	1216	1151	1282	1330	1266	1397	0.893	0.888	0.898	0.902	0.896	0.907	0.897	0.892	0.903
0.14	9	12346	11137	11070	11201	1209	1144	1275	1331	1267	1398	0.893	0.888	0.898	0.902	0.897	0.907	0.898	0.892	0.903
0.14	8	12331	11132	11065	11195	1199	1135	1265	1336	1273	1403	0.893	0.887	0.898	0.903	0.897	0.908	0.898	0.892	0.903
0.13	10	12354	11138	11071	11202	1216	1151	1282	1330	1266	1397	0.893	0.888	0.898	0.902	0.896	0.907	0.897	0.892	0.903
0.13	9	12346	11137	11070	11201	1209	1144	1275	1331	1267	1398	0.893	0.888	0.898	0.902	0.897	0.907	0.898	0.892	0.903
0.13	8	12331	11132	11065	11195	1199	1135	1265	1336	1273	1403	0.893	0.887	0.898	0.903	0.897	0.908	0.898	0.892	0.903
0.12	10	12354	11138	11071	11202	1216	1151	1282	1330	1266	1397	0.893	0.888	0.898	0.902	0.896	0.907	0.897	0.892	0.903
0.12	9	12346	11137	11070	11201	1209	1144	1275	1331	1267	1398	0.893	0.888	0.898	0.902	0.897	0.907	0.898	0.892	0.903
0.12	8	12331	11132	11065	11195	1199	1135	1265	1336	1273	1403	0.893	0.887	0.898	0.903	0.897	0.908	0.898	0.892	0.903
0.11	10	12353	11138	11071	11202	1215	1150	1281	1330	1266	1397	0.893	0.888	0.898	0.902	0.896	0.907	0.897	0.892	0.903
0.11	9	12345	11137	11070	11201	1208	1143	1274	1331	1267	1398	0.893	0.888	0.898	0.902	0.897	0.907	0.898	0.892	0.903
0.11	8	12330	11132	11065	11195	1198	1134	1264	1336	1273	1403	0.893	0.887	0.898	0.903	0.897	0.908	0.898	0.892	0.903
0.1	10	12353	11138	11071	11202	1215	1150	1281	1330	1266	1397	0.893	0.888	0.898	0.902	0.896	0.907	0.897	0.892	0.903
0.1	9	12345	11137	11070	11201	1208	1143	1274	1331	1267	1398	0.893	0.888	0.898	0.902	0.897	0.907	0.898	0.892	0.903
0.1	8	12330	11132	11065	11195	1198	1134	1264	1336	1273	1403	0.893	0.887	0.898	0.903	0.897	0.908	0.898	0.892	0.903
0.09	10	12301	11129	11063	11192	1172	1108	1237	1339	1276	1405	0.893	0.887	0.898	0.905	0.899	0.91	0.899	0.893	0.904
0.09	9	12294	11128	11062	11190	1166	1103	1231	1340	1278	1406	0.893	0.887	0.897	0.905	0.9	0.91	0.899	0.894	0.904
0.09	8	12282	11124	11058	11186	1158	1095	1223	1344	1282	1410	0.892	0.887	0.897	0.906	0.9	0.911	0.899	0.894	0.904
0.08	10	12266	11124	11059	11186	1142	1079	1206	1344	1282	1409	0.892	0.887	0.897	0.907	0.902	0.912	0.899	0.894	0.905
0.08	9	12260	11123	11058	11185	1137	1074	1201	1345	1283	1410	0.892	0.887	0.897	0.907	0.902	0.912	0.9	0.894	0.905
0.08	8	12249	11120	11055	11182	1129	1066	1193	1348	1286	1413	0.892	0.887	0.897	0.908	0.903	0.913	0.9	0.895	0.905
0.07	10	12203	11111	11047	11172	1092	1030	1155	1357	1296	1421	0.891	0.886	0.896	0.911	0.905	0.916	0.901	0.896	0.906
0.07	9	12198	11110	11046	11170	1088	1027	1151	1358	1298	1422	0.891	0.886	0.896	0.911	0.906	0.916	0.901	0.896	0.906
0.07	8	12189	11107	11043	11167	1082	1021	1145	1361	1301	1425	0.891	0.886	0.896	0.911	0.906	0.916	0.901	0.896	0.906
0.06	10	12143	11090	11027	11150	1053	992	1115	1378	1318	1441	0.889	0.884	0.894	0.913	0.908	0.918	0.901	0.896	0.906
0.06	9	12140	11090	11027	11149	1050	990	1112	1378	1319	1441	0.889	0.884	0.894	0.914	0.908	0.918	0.901	0.896	0.906
0.06	8	12135	11088	11025	11147	1047	987	1109	1380	1321	1443	0.889	0.884	0.894	0.914	0.909	0.919	0.901	0.896	0.906
0.05	10	12069	11065	11003	11123	1004	945	1065	1403	1345	1465	0.887	0.882	0.892	0.917	0.912	0.922	0.902	0.897	0.907
0.05	9	12069	11065	11003	11123	1004	945	1065	1403	1345	1465	0.887	0.882	0.892	0.917	0.912	0.922	0.902	0.897	0.907
0.05	8	12068	11064	11002	11122	1004	945	1065	1404	1346	1466	0.887	0.882	0.892	0.917	0.912	0.922	0.902	0.897	0.907
0.05	7	12066	11064	11002	11122	1002	943	1063	1404	1346	1466	0.887	0.882	0.892	0.917	0.912	0.922	0.902	0.897	0.907
0.05	6	12062	11061	10999	11119	1001	942	1062	1407	1349	1469	0.887	0.882	0.892	0.917	0.912	0.922	0.902	0.897	0.907
0.05	5	12056	11055	10993	11113	1001	942	1062	1413	1355	1475	0.887	0.882	0.891	0.917	0.912	0.922	0.902	0.897	0.906
0.05	4	12045	11049	10988	11107	996	937	1056	1419	1361	1480	0.886	0.881	0.891	0.917	0.912	0.922	0.901	0.897	0.906
0.05	3	11996	11008	10947	11066	988	929	1048	1460	1402	1521	0.883	0.878	0.888	0.918	0.913	0.923	0.9	0.895	0.905
0.05	2	11878	10902	10841	10959	976	918	1036	1566	1509	1627	0.874	0.87	0.879	0.918	0.913	0.923	0.896	0.891	0.9
0.04	10	11945	10976	10915	11033	969	911	1029	1492	1435	1553	0.88	0.875	0.885	0.919	0.914	0.924	0.899	0.894	0.904
0.04	9	11945	10976	10915	11033	969	911	1029	1492	1435	1553	0.88	0.875	0.885	0.919	0.914	0.924	0.899	0.894	0.904
0.04	8	11944	10975	10914	11032	969	911	1029	1493	1436	1554	0.88	0.875	0.885	0.919	0.914	0.924	0.899	0.894	0.904
0.04	7	11944	10975	10914	11032	969	911	1029	1493	1436	1554	0.88	0.875	0.885	0.919	0.914	0.924	0.899	0.894	0.904
0.04	6	11941	10972	10911	11029	969	911	1029	1496	1439	1557	0.88	0.875	0.885	0.919	0.914	0.924	0.899	0.894	0.904
0.04	5	11938	10969	10908	11026	969	911	1029	1499	1442	1560	0.88	0.875	0.884	0.919	0.914	0.924	0.899	0.894	0.904
0.04	4	11932	10965	10904	11022	967	909	1027	1503	1446	1564	0.879	0.875	0.884	0.919	0.914	0.924	0.899	0.894	0.903
0.04	3	11894	10929	10868	10986	965	907	1025	1539	1482	1600	0.877	0.872	0.881	0.919	0.914	0.924	0.897	0.892	0.902
0.04	2	11795	10836	10776	10893	959	901	1018	1632	1575	1692	0.869	0.864	0.874	0.919	0.914	0.924	0.893	0.888	0.898
0.03	10	11701	10767	10707	10823	934	877	993	1701	1645	1761	0.864	0.859	0.868	0.92	0.915	0.925	0.891	0.886	0.896
0.03	9	11701	10767	10707	10823	934	877	993	1701	1645	1761	0.864	0.859	0.868	0.92	0.915	0.925	0.891	0.886	0.896
0.03	8	11701	10767	10707	10823	934	877	993	1701	1645	1761	0.864	0.859	0.868	0.92	0.915	0.925	0.891	0.886	0.896
0.03	7	11701	10767	10707	10823	934	877	993	1701	1645	1761	0.864	0.859	0.868	0.92	0.915	0.925	0.891	0.886	0.896
0.03	6	11699	10765	10705	10821	934	877	993	1703	1647	1763	0.863	0.859	0.868	0.92	0.915	0.925	0.891	0.886	0.896
0.03	5	11698	10764	10704	10820	934	877	993	1704	1648	1764	0.863	0.859	0.868	0.92	0.915	0.925	0.891	0.886	0.896
0.03	4	11693	10761	10701	10817	932	875	991	1707	1651	1767	0.863	0.858	0.868	0.92	0.915	0.925	0.891	0.886	0.895
0.03	3	11670	10738	10678	10794	932	875	991	1730	1674	1790	0.861	0.856	0.866	0.92	0.915	0.925	0.89	0.885	0.894
0.05	1	11445	10498	10438	10555	947	889	1006	1970	1913	2030	0.842	0.837	0.847	0.917	0.912	0.922	0.878	0.873	0.883
0.03	2	11601	10671	10611	10727	930	873	989	1797	1741	1857	0.856	0.851	0.86	0.92	0.915	0.925	0.887	0.882	0.891
0.04	1	11397	10461	10401	10517	936	879	995	2007	1951	2067	0.839	0.834	0.844	0.918	0.913	0.923	0.877	0.872	0.881
0.03	1	11286	10371	10312	10427	915	858	973	2097	2041	2156	0.832	0.827	0.836	0.919	0.914	0.924	0.873	0.868	0.878
0.02	7	11212	10306	10247	10361	906	850	964	2162	2107	2221	0.827	0.822	0.831	0.919	0.914	0.924	0.87	0.865	0.875
0.02	6	11211	10305	10246	10360	906	850	964	2163	2108	2222	0.827	0.822	0.831	0.919	0.914	0.924	0.87	0.865	0.875
0.02	5	11211	10305	10246	10360	906	850	964	2163	2108	2222	0.827	0.822	0.831	0.919	0.914	0.924	0.87	0.865	0.875
0.02	4	11207	10303	10244	10358	904	848	962	2165	2110	2224	0.826	0.822	0.831	0.919	0.914	0.924	0.87	0.865	0.875
0.02	3	11200	10296	10237	10351	904	848	962	2172	2117	2231	0.826	0.821	0.83	0.919	0.914	0.924	0.87	0.865	0.875
0.02	2	11162	10258	10199	10313	904	848	962	2210	2155	2269	0.823	0.818	0.827	0.919	0.914	0.924	0.868	0.863	0.873
0.02	1	10977	10080	10022	10135	897	841	954	2388	2333	2446	0.808	0.804	0.813	0.918	0.913	0.923	0.86	0.855	0.865
0.01	3	10074	9208	9151	9262	866	811	922	3260	3206	3317	0.739	0.734	0.743	0.914	0.908	0.919	0.817	0.812	0.822
0.01	2	10074	9208	9151	9262	866	811	922	3260	3206	3317	0.739	0.734	0.743	0.914	0.908	0.919	0.817	0.812	0.822
0.01	1	10041	9177	9120	9231	864	809	920	3291	3237	3348	0.736	0.731	0.74	0.914	0.908	0.919	0.815	0.81	0.82
0	1	9399	8550	8493	8603	849	795	905	3918	3865	3975	0.686	0.681	0.69	0.91	0.904	0.915	0.782	0.777	0.787
Varscan+cmDetect
Max allele frequency in blood	Max supporting read count in blood	TVarscan+cmDetect	TPVarscan+cmDetect	TPVarscan+cmDetect low	TPVarscan+cmDetect high	FPVarscan+cmDetect	FPVarscan+cmDetect low	FPVarscan+cmDetect high	FNVarscan+cmDetect	FNVarscan+cmDetect low	FNVarscan+cmDetect high	RecallVarscan+cmDetect	RecallVarscan+cmDetect low	RecallVarscan+cmDetect high	PrecisVarscan+cmDetect	PrecisVarscan+cmDetect low	PrecisVarscan+cmDetect high	FscoreVarscan+cmDetect	FscoreVarscan+cmDetect low	FscoreVarscan+cmDetect high
0.15	10	12365	11149	11082	11213	1216	1151	1282	1319	1255	1386	0.894	0.889	0.899	0.902	0.896	0.907	0.898	0.893	0.903
0.15	9	12357	11148	11081	11212	1209	1144	1275	1320	1256	1387	0.894	0.889	0.899	0.902	0.897	0.907	0.898	0.893	0.903
0.15	8	12343	11144	11077	11207	1199	1135	1265	1324	1261	1391	0.894	0.888	0.899	0.903	0.898	0.908	0.898	0.893	0.903
0.14	10	12365	11149	11082	11213	1216	1151	1282	1319	1255	1386	0.894	0.889	0.899	0.902	0.896	0.907	0.898	0.893	0.903
0.14	9	12357	11148	11081	11212	1209	1144	1275	1320	1256	1387	0.894	0.889	0.899	0.902	0.897	0.907	0.898	0.893	0.903
0.14	8	12343	11144	11077	11207	1199	1135	1265	1324	1261	1391	0.894	0.888	0.899	0.903	0.898	0.908	0.898	0.893	0.903
0.13	10	12365	11149	11082	11213	1216	1151	1282	1319	1255	1386	0.894	0.889	0.899	0.902	0.896	0.907	0.898	0.893	0.903
0.13	9	12357	11148	11081	11212	1209	1144	1275	1320	1256	1387	0.894	0.889	0.899	0.902	0.897	0.907	0.898	0.893	0.903
0.13	8	12343	11144	11077	11207	1199	1135	1265	1324	1261	1391	0.894	0.888	0.899	0.903	0.898	0.908	0.898	0.893	0.903
0.12	10	12365	11149	11082	11213	1216	1151	1282	1319	1255	1386	0.894	0.889	0.899	0.902	0.896	0.907	0.898	0.893	0.903
0.12	9	12357	11148	11081	11212	1209	1144	1275	1320	1256	1387	0.894	0.889	0.899	0.902	0.897	0.907	0.898	0.893	0.903
0.12	8	12343	11144	11077	11207	1199	1135	1265	1324	1261	1391	0.894	0.888	0.899	0.903	0.898	0.908	0.898	0.893	0.903
0.11	10	12364	11149	11082	11213	1215	1150	1281	1319	1255	1386	0.894	0.889	0.899	0.902	0.896	0.907	0.898	0.893	0.903
0.11	9	12356	11148	11081	11212	1208	1143	1274	1320	1256	1387	0.894	0.889	0.899	0.902	0.897	0.907	0.898	0.893	0.903
0.11	8	12342	11144	11077	11207	1198	1134	1264	1324	1261	1391	0.894	0.888	0.899	0.903	0.898	0.908	0.898	0.893	0.903
0.1	10	12364	11149	11082	11213	1215	1150	1281	1319	1255	1386	0.894	0.889	0.899	0.902	0.896	0.907	0.898	0.893	0.903
0.1	9	12356	11148	11081	11212	1208	1143	1274	1320	1256	1387	0.894	0.889	0.899	0.902	0.897	0.907	0.898	0.893	0.903
0.1	8	12342	11144	11077	11207	1198	1134	1264	1324	1261	1391	0.894	0.888	0.899	0.903	0.898	0.908	0.898	0.893	0.903
0.09	10	12312	11140	11074	11203	1172	1108	1237	1328	1265	1394	0.893	0.888	0.899	0.905	0.9	0.91	0.899	0.894	0.904
0.09	9	12305	11139	11073	11201	1166	1103	1231	1329	1267	1395	0.893	0.888	0.898	0.905	0.9	0.91	0.899	0.894	0.904
0.09	8	12294	11136	11070	11198	1158	1095	1223	1332	1270	1398	0.893	0.888	0.898	0.906	0.901	0.911	0.899	0.894	0.904
0.08	10	12278	11136	11071	11198	1142	1079	1206	1332	1270	1397	0.893	0.888	0.898	0.907	0.902	0.912	0.9	0.895	0.905
0.08	9	12272	11135	11070	11197	1137	1074	1201	1333	1271	1398	0.893	0.888	0.898	0.907	0.902	0.912	0.9	0.895	0.905
0.08	8	12262	11133	11068	11195	1129	1066	1193	1335	1273	1400	0.893	0.888	0.898	0.908	0.903	0.913	0.9	0.895	0.905
0.07	10	12215	11123	11059	11184	1092	1030	1155	1345	1284	1409	0.892	0.887	0.897	0.911	0.905	0.916	0.901	0.896	0.906
0.07	9	12210	11122	11058	11183	1088	1026	1151	1346	1285	1410	0.892	0.887	0.897	0.911	0.906	0.916	0.901	0.896	0.906
0.07	8	12202	11120	11056	11180	1082	1021	1145	1348	1288	1412	0.892	0.887	0.897	0.911	0.906	0.916	0.901	0.896	0.906
0.06	10	12160	11107	11044	11167	1053	992	1115	1361	1301	1424	0.891	0.886	0.896	0.913	0.908	0.918	0.902	0.897	0.907
0.06	9	12157	11107	11044	11166	1050	990	1112	1361	1302	1424	0.891	0.886	0.896	0.914	0.909	0.919	0.902	0.897	0.907
0.06	8	12153	11106	11043	11165	1047	987	1109	1362	1303	1425	0.891	0.886	0.895	0.914	0.909	0.919	0.902	0.897	0.907
0.05	10	12095	11091	11029	11149	1004	945	1065	1377	1319	1439	0.89	0.885	0.894	0.917	0.912	0.922	0.903	0.898	0.908
0.05	9	12095	11091	11029	11149	1004	945	1065	1377	1319	1439	0.89	0.885	0.894	0.917	0.912	0.922	0.903	0.898	0.908
0.05	8	12094	11090	11028	11148	1004	945	1065	1378	1320	1440	0.889	0.885	0.894	0.917	0.912	0.922	0.903	0.898	0.908
0.05	7	12092	11090	11028	11148	1002	943	1063	1378	1320	1440	0.889	0.885	0.894	0.917	0.912	0.922	0.903	0.898	0.908
0.05	6	12090	11089	11027	11147	1001	942	1062	1379	1321	1441	0.889	0.884	0.894	0.917	0.912	0.922	0.903	0.898	0.908
0.05	5	12086	11085	11023	11143	1001	942	1062	1383	1325	1445	0.889	0.884	0.894	0.917	0.912	0.922	0.903	0.898	0.908
0.05	4	12079	11083	11022	11141	996	937	1056	1385	1327	1446	0.889	0.884	0.894	0.918	0.913	0.922	0.903	0.898	0.908
0.05	3	12058	11070	11009	11128	988	929	1048	1398	1340	1459	0.888	0.883	0.893	0.918	0.913	0.923	0.903	0.898	0.907
0.05	2	12019	11043	10982	11100	976	918	1036	1425	1368	1486	0.886	0.881	0.89	0.919	0.914	0.924	0.902	0.897	0.907
0.04	10	12005	11036	10975	11093	969	911	1029	1432	1375	1493	0.885	0.88	0.89	0.919	0.914	0.924	0.902	0.897	0.907
0.04	9	12005	11036	10975	11093	969	911	1029	1432	1375	1493	0.885	0.88	0.89	0.919	0.914	0.924	0.902	0.897	0.907
0.04	8	12004	11035	10974	11092	969	911	1029	1433	1376	1494	0.885	0.88	0.89	0.919	0.914	0.924	0.902	0.897	0.907
0.04	7	12004	11035	10974	11092	969	911	1029	1433	1376	1494	0.885	0.88	0.89	0.919	0.914	0.924	0.902	0.897	0.907
0.04	6	12003	11034	10973	11091	969	911	1029	1434	1377	1495	0.885	0.88	0.89	0.919	0.914	0.924	0.902	0.897	0.907
0.04	5	12002	11033	10972	11090	969	911	1029	1435	1378	1496	0.885	0.88	0.889	0.919	0.914	0.924	0.902	0.897	0.906
0.04	4	11998	11031	10970	11088	967	909	1027	1437	1380	1498	0.885	0.88	0.889	0.919	0.914	0.924	0.902	0.897	0.906
0.04	3	11984	11019	10958	11076	965	907	1025	1449	1392	1510	0.884	0.879	0.888	0.919	0.914	0.924	0.901	0.896	0.906
0.04	2	11956	10997	10937	11054	959	901	1018	1471	1414	1531	0.882	0.877	0.887	0.92	0.915	0.925	0.901	0.896	0.905
0.03	10	11854	10920	10860	10976	934	877	993	1548	1492	1608	0.876	0.871	0.88	0.921	0.916	0.926	0.898	0.893	0.903
0.03	9	11854	10920	10860	10976	934	877	993	1548	1492	1608	0.876	0.871	0.88	0.921	0.916	0.926	0.898	0.893	0.903
0.03	8	11854	10920	10860	10976	934	877	993	1548	1492	1608	0.876	0.871	0.88	0.921	0.916	0.926	0.898	0.893	0.903
0.03	7	11854	10920	10860	10976	934	877	993	1548	1492	1608	0.876	0.871	0.88	0.921	0.916	0.926	0.898	0.893	0.903
0.03	6	11853	10919	10859	10975	934	877	993	1549	1493	1609	0.876	0.871	0.88	0.921	0.916	0.926	0.898	0.893	0.903
0.03	5	11853	10919	10859	10975	934	877	993	1549	1493	1609	0.876	0.871	0.88	0.921	0.916	0.926	0.898	0.893	0.903
0.03	4	11850	10918	10858	10974	932	875	991	1550	1494	1610	0.876	0.871	0.88	0.921	0.916	0.926	0.898	0.893	0.903
0.03	3	11844	10912	10852	10968	932	875	991	1556	1500	1616	0.875	0.87	0.88	0.921	0.916	0.926	0.898	0.893	0.902
0.05	1	11868	10921	10861	10978	947	889	1006	1547	1490	1607	0.876	0.871	0.88	0.92	0.915	0.925	0.898	0.893	0.902
0.03	2	11826	10896	10836	10952	930	873	989	1572	1516	1632	0.874	0.869	0.878	0.921	0.916	0.926	0.897	0.892	0.902
0.04	1	11826	10890	10830	10946	936	879	995	1578	1522	1638	0.873	0.869	0.878	0.921	0.916	0.926	0.897	0.892	0.901
0.03	1	11726	10811	10752	10867	915	858	973	1657	1601	1716	0.867	0.862	0.872	0.922	0.917	0.927	0.894	0.889	0.898
0.02	7	11601	10695	10636	10750	906	850	964	1773	1718	1832	0.858	0.853	0.862	0.922	0.917	0.927	0.889	0.884	0.893
0.02	6	11601	10695	10636	10750	906	850	964	1773	1718	1832	0.858	0.853	0.862	0.922	0.917	0.927	0.889	0.884	0.893
0.02	5	11601	10695	10636	10750	906	850	964	1773	1718	1832	0.858	0.853	0.862	0.922	0.917	0.927	0.889	0.884	0.893
0.02	4	11598	10694	10635	10749	904	848	962	1774	1719	1833	0.858	0.853	0.862	0.922	0.917	0.927	0.889	0.884	0.893
0.02	3	11596	10692	10633	10747	904	848	962	1776	1721	1835	0.858	0.853	0.862	0.922	0.917	0.927	0.889	0.884	0.893
0.02	2	11585	10681	10622	10736	904	848	962	1787	1732	1846	0.857	0.852	0.861	0.922	0.917	0.927	0.888	0.883	0.893
0.02	1	11527	10630	10571	10685	897	841	955	1838	1783	1897	0.853	0.848	0.857	0.922	0.917	0.927	0.886	0.881	0.891
0.01	3	11031	10165	10107	10219	866	811	923	2303	2249	2361	0.815	0.811	0.82	0.921	0.916	0.926	0.865	0.86	0.87
0.01	2	11031	10165	10107	10219	866	811	923	2303	2249	2361	0.815	0.811	0.82	0.921	0.916	0.926	0.865	0.86	0.87
0.01	1	11012	10148	10090	10202	864	809	921	2320	2266	2378	0.814	0.809	0.818	0.922	0.916	0.927	0.864	0.859	0.869
0	1	10618	9769	9712	9823	849	794	905	2699	2645	2756	0.784	0.779	0.788	0.92	0.915	0.925	0.846	0.841	0.851
