# Supplementary material for: Improving the Performance of Somatic Mutation Identification by Recovering Circulating Tumor DNA Mutations
Source: Oxford University Press journal article supplement (doi:10.1158/0008-5472.can-15-3457), 2016-08-17
Supplement: 00085472can153457-sup-159846_2_supp_3548272_99k2tp.xlsx [file 00085472can153457-sup-159846_2_supp_3548272_99k2tp.xlsx]

## Sheet: Supplementary Table 6
Supplementary Table 6: clinical information for 93 breat cancer and 60 pan-cancer metastatic patients
PatientID	Organ	Nb lines of chemo for metastasis	Survival at 12 months	pct cell tum
BC01	Hepatic	3lines or more	Alive at 12 months	30
BC02	Skin	1-2 Lines	Alive at 12 months
BC03	Lymph Node	No prior Chemo	Alive at 12 months	70
BC04	Hepatic	3lines or more	Alive at 12 months	90
BC05	Other	1-2 Lines	Alive at 12 months	80
BC06	Hepatic	3lines or more	Alive at 12 months	60
BC07	Hepatic	3lines or more	Alive at 12 months	50
BC08	Hepatic	3lines or more	Alive at 12 months	50
BC09	Hepatic	3lines or more	Alive at 12 months
BC10	Hepatic	3lines or more	Death Before 12 month	60
BC11	Hepatic	3lines or more	Death Before 12 month	80
BC12	Hepatic	1-2 Lines	Alive at 12 months	80
BC13	Other	3lines or more	Alive at 12 months	30
BC14	Other	3lines or more	Alive at 12 months	90
BC15	Hepatic	3lines or more	Alive at 12 months	30
BC16	Hepatic	1-2 Lines	Alive at 12 months	60
BC17	Hepatic	3lines or more	Death Before 12 month	50
BC18	Hepatic	1-2 Lines	Alive at 12 months	90
BC19	Hepatic	1-2 Lines	Alive Follow-Up <=12 months	70
BC20	Skin	1-2 Lines	Alive at 12 months	80
BC21	Lymph Node	1-2 Lines	Alive at 12 months	40
BC22	Other	1-2 Lines	Alive at 12 months	30
BC23	Hepatic	1-2 Lines	Death Before 12 month	80
BC24	Hepatic	No prior Chemo	Alive at 12 months	80
BC25	Hepatic	1-2 Lines	Alive at 12 months	80
BC26	Other	3lines or more	Alive at 12 months	50
BC27	Lymph Node	1-2 Lines	Death Before 12 month	60
BC28	Hepatic	3lines or more	Alive at 12 months	50
BC29	Other	1-2 Lines	Alive Follow-Up <=12 months
BC30	Lymph Node	1-2 Lines	Alive at 12 months	80
BC31	Hepatic	1-2 Lines	Alive at 12 months
BC32	Skin	1-2 Lines	Alive Follow-Up <=12 months	50
BC33	Lymph Node	1-2 Lines	Alive at 12 months	50
BC34	Skin	1-2 Lines	Alive at 12 months	60
BC35	Lymph Node	1-2 Lines	Alive at 12 months	50
BC36	Other	No prior Chemo	Alive at 12 months	50
BC37	Lymph Node	1-2 Lines	Alive at 12 months	60
BC38	Lymph Node	1-2 Lines	Death Before 12 month	30
BC39	Lymph Node	1-2 Lines	Alive at 12 months	80
BC40	Other	No prior Chemo	Alive at 12 months	50
BC41	Lymph Node	1-2 Lines	Alive Follow-Up <=12 months	50
BC42	Lymph Node	1-2 Lines	Alive Follow-Up <=12 months	80
BC43	Lymph Node	1-2 Lines	Alive Follow-Up <=12 months	90
BC44	Hepatic	No prior Chemo	Alive at 12 months	80
BC45	Skin	1-2 Lines	Alive at 12 months	30
BC46	Skin	1-2 Lines	Alive at 12 months	40
BC47	Other	3lines or more	Alive at 12 months	80
BC48	Hepatic	1-2 Lines	Death Before 12 month	70
BC49	Lymph Node	1-2 Lines	Alive at 12 months
BC50	Other	1-2 Lines	Alive at 12 months
BC51	Lymph Node	1-2 Lines	Alive Follow-Up <=12 months	70
BC52	Lymph Node	3lines or more	Alive at 12 months	80
BC53	Other	1-2 Lines	Alive at 12 months	60
BC54	Other	1-2 Lines	Alive at 12 months	30
BC55	Skin	1-2 Lines	Alive at 12 months	80
BC56	Hepatic	1-2 Lines	Alive at 12 months
BC57	Skin	1-2 Lines	Alive Follow-Up <=12 months	60
BC58	Hepatic	No prior Chemo	Alive at 12 months	60
BC59	Hepatic	1-2 Lines	Alive Follow-Up <=12 months	80
BC60	Skin	3lines or more	Alive at 12 months	50
BC61	Hepatic	1-2 Lines	Alive at 12 months	40
BC62	Hepatic	1-2 Lines	Alive Follow-Up <=12 months	30
BC63	Hepatic	1-2 Lines	Death Before 12 month	70
BC64	Lymph Node	1-2 Lines	Alive Follow-Up <=12 months	60
BC65	Other	1-2 Lines	Alive at 12 months	30
BC66	Other	No prior Chemo	Alive at 12 months
BC67	Lymph Node	1-2 Lines	Death Before 12 month	70
BC68	Other	No prior Chemo	Death Before 12 month	40
BC69	Hepatic	1-2 Lines	Alive at 12 months	90
BC70	Other	No prior Chemo	Alive at 12 months	60
BC71	Hepatic	1-2 Lines	Death Before 12 month	70
BC72	Other	1-2 Lines	Alive at 12 months	30
BC73	Lymph Node	3lines or more	Alive at 12 months	70
BC74	Hepatic	1-2 Lines	Alive at 12 months
BC75	Other	1-2 Lines	Alive at 12 months	80
BC76	Hepatic	1-2 Lines	Alive Follow-Up <=12 months	80
BC77	Hepatic	1-2 Lines	Alive at 12 months	50
BC78	Hepatic	1-2 Lines	Alive at 12 months	50
BC79	Other	1-2 Lines	Alive Follow-Up <=12 months	60
BC80	Hepatic	1-2 Lines	Alive at 12 months	80
BC81	Hepatic	1-2 Lines	Death Before 12 month	80
BC82	Hepatic	1-2 Lines	Alive at 12 months	60
BC83	Other	1-2 Lines	Alive at 12 months	30
BC84	Hepatic	1-2 Lines	Alive at 12 months	30
BC85	Lymph Node	1-2 Lines	Death Before 12 month	60
BC86	Hepatic	1-2 Lines	Death Before 12 month	60
BC87	Skin	3lines or more		80
BC88	Hepatic	3lines or more		80
BC89	Lymph Node	3lines or more		70
BC90	Lymph Node	3lines or more		70
BC91	Hepatic	3lines or more		70
BC92	Other	3lines or more		80
BC93	Hepatic	3lines or more		50
PCAN01				NA
PCAN02				80
PCAN02RE				70
PCAN03				30
PCAN04				50
PCAN05				50
PCAN06				60
PCAN07				90
PCAN08				60
PCAN09				35
PCAN10				40
PCAN11				70
PCAN12				40
PCAN13				NA
PCAN14				30
PCAN15				60
PCAN16				40
PCAN17				NA
PCAN18				60
PCAN19				70
PCAN20				70
PCAN21				30
PCAN22				60
PCAN23				70
PCAN24				70
PCAN25				40
PCAN26				50
PCAN27				30
PCAN28				40
PCAN29				60
PCAN30				90
PCAN31				70
PCAN32				30
PCAN33				30
PCAN34				30
PCAN35				30
PCAN36				60
PCAN37				40
PCAN38				70
PCAN39				60
PCAN40				65
PCAN41				70
PCAN42				40
PCAN43				60
PCAN44				50
PCAN45				70
PCAN46				70
PCAN47				30
PCAN48				40
PCAN49				30
PCAN50				40
PCAN51				50
PCAN52				70
PCAN53				60
PCAN54				30
PCAN55				40
PCAN56				70
PCAN57				60
PCAN58				30
PCAN59				40
PCAN60				30
PCAN60RE				60
