# Supplementary material for: Improving the Performance of Somatic Mutation Identification by Recovering Circulating Tumor DNA Mutations
Source: Oxford University Press journal article supplement (doi:10.1158/0008-5472.can-15-3457), 2016-08-17
Supplement: 00085472can153457-sup-159846_2_supp_3548277_69k2tp.xlsx [file 00085472can153457-sup-159846_2_supp_3548277_69k2tp.xlsx]

## Sheet: Supplementary Table 11
Supplementary Table 11: quality metrics for the targeted sequencing of the 46 plasma samples
plasma sample id	GENOME_SIZE	TARGET_TERRITORY	TOTAL_READS	PF_READS	PF_UNIQUE_READS	PF_UQ_READS_ALIGNED	PCT_PF_UQ_READS_ALIGNED	PF_UQ_BASES_ALIGNED	ON_TARGET_BASES	PCT_SELECTED_BASES	MEAN_TARGET_COVERAGE	PCT_USABLE_BASES_ON_TARGET	FOLD_ENRICHMENT	ZERO_CVG_TARGETS_PCT	PCT_TARGET_BASES_2X	PCT_TARGET_BASES_10X	PCT_TARGET_BASES_20X	PCT_TARGET_BASES_30X	PCT_TARGET_BASES_40X	PCT_TARGET_BASES_50X	PCT_TARGET_BASES_100X	AT_DROPOUT	GC_DROPOUT
PCAN01	3095693983	22234	68538	68538	68538	68538	1	6932856	6932856	1	373.739	0.911016	139232	0.154589	0.826437	0.826437	0.826437	0.826437	0.822569	0.822569	0.807682	3.85496	11.8687
BC90	3095693983	22234	208236	208236	208236	208192	0.999789	22712542	20983864	1	943.774	0.912323	128635	0	1	1	1	1	1	1	0.994288	4.15732	8.99114
BC91	3095693983	22234	30962	30962	30962	30953	0.999709	3334871	3098448	1	139.356	0.922703	129362	0	1	1	1	0.995727	0.988576	0.969146	0.725825	8.07955	2.18526
PCAN02	3095693983	22234	100708	100708	100708	100692	0.999841	11338581	10584076	1	476.031	0.927856	129967	0	1	1	1	1	1	1	0.996087	5.15727	2.27384
BC93	3095693983	22234	70807	70807	70807	70777	0.999576	7661271	7084269	1	318.623	0.884743	128746	0	1	1	1	0.994828	0.978456	0.963884	0.918323	6.19712	6.86108
PCAN06	3095693983	22234	50243	50243	50243	50221	0.999562	5550395	5133314	1	230.877	0.918788	128770	0	1	1	1	1	0.9906	0.99051	0.951561	4.38365	4.24398
PCAN09	3095693983	22234	108943	108943	108943	108855	0.999192	11871904	10994332	1	494.483	0.916458	128940	0	1	1	1	1	1	1	0.994243	1.33319	7.08372
PCAN10-1	3095693983	22234	101460	101460	101460	101412	0.999527	11143592	10372501	1	466.515	0.923567	129598	0	1	1	1	1	1	1	0.999955	3.19592	4.61204
PCAN10-2	3095693983	22234	44473	44473	44473	44448	0.999438	4928558	4594676	1	206.651	0.92359	129800	0	1	1	1	1	1	0.996087	0.94297	4.53967	3.13277
PCAN11-1	3095693983	22234	185706	185706	185706	185592	0.999386	20341129	18844056	1	847.533	0.917643	128985	0	1	1	1	1	1	1	1	2.67642	5.38791
PCAN11-2	3095693983	22234	110450	110450	110450	110355	0.99914	12103380	11231870	1	505.166	0.91765	129207	0	1	1	1	1	1	1	0.99982	2.47674	5.53504
PCAN12	3095693983	22234	67411	67411	67411	67381	0.999555	7449679	6974317	1	313.678	0.930393	130348	0	1	1	0.996087	0.996087	0.996087	0.995772	0.964199	7.51908	1.98817
PCAN14	3095693983	22234	37606	37606	37606	37595	0.999707	4154290	3871483	1	174.124	0.926728	129754	0	1	1	0.996087	0.996087	0.992219	0.983359	0.862238	8.49048	1.58492
PCAN16	3095693983	22234	77824	77824	77824	77802	0.999717	8362534	7821958	1	351.802	0.926827	130232	0	1	1	1	1	0.999955	0.999955	0.97108	2.655	8.76808
PCAN19	3095693983	22234	173825	173825	173825	173771	0.999689	19423183	17814796	1	801.241	0.909806	127703	0	1	1	1	1	1	1	1	4.75199	3.58686
PCAN20	3095693983	22234	55438	55438	55438	55413	0.999549	6167990	5648477	1	254.047	0.906647	127505	0	1	1	1	1	0.9991	0.997706	0.902537	5.75606	4.12179
PCAN21	3095693983	22234	51969	51969	51969	51953	0.999692	5713022	5295802	1	238.185	0.918079	129064	0	1	1	1	1	0.996087	0.996087	0.956103	4.22165	3.66591
PCAN22	3095693983	22234	57878	57878	57878	57849	0.999499	6331923	5858944	1	263.513	0.917328	128832	0	1	1	1	1	1	1	0.953	4.35439	4.3788
PCAN23	3095693983	22234	9159	9159	9159	9154	0.999454	1003323	934481	1	42.0294	0.923231	129679	0	1	0.986867	0.903481	0.747369	0.515742	0.300891	0.005982	3.36574	6.16649
PCAN25	3095693983	22234	59712	59712	59712	59676	0.999397	6618944	6181313	1	278.012	0.924925	130027	0	1	1	1	1	1	1	0.971665	2.5356	5.4703
PCAN26	3095693983	22234	68061	68061	68061	68031	0.999559	7481795	6944725	1	312.347	0.91835	129238	0	1	1	1	1	1	1	0.982055	3.6552	4.90817
PCAN28	3095693983	22234	113996	113996	113996	113936	0.999474	12447839	11557204	1	519.799	0.920484	129270	0	1	1	1	1	1	1	0.99078	4.77117	6.94832
PCAN29	3095693983	22234	28877	28877	28877	28865	0.999584	3177306	2943223	1	132.375	0.918233	128975	0	1	1	0.996087	0.989116	0.963075	0.936494	0.681704	5.77515	4.77938
PCAN32	3095693983	22234	64938	64938	64938	64904	0.999476	7168037	6657111	1	299.411	0.920924	129308	0	1	0.99991	0.996087	0.996087	0.996087	0.993793	0.951201	6.35276	4.75935
PCAN33	3095693983	22234	69118	69118	69118	69103	0.999783	7570423	7129289	1	320.648	0.936048	131119	0	1	1	1	1	0.996087	0.992939	0.97225	8.58291	1.71874
PCAN34	3095693983	22234	152317	152317	152317	152277	0.999737	16762078	15737843	1	707.828	0.932738	130725	0	1	1	1	1	1	1	1	5.42682	2.55379
PCAN36	3095693983	22234	111058	111058	111058	111022	0.999676	12262802	11471452	1	515.942	0.929217	130247	0	1	1	1	1	0.996087	0.996087	0.988531	7.14432	2.14436
PCAN37	3095693983	22234	150275	150275	150275	150241	0.999774	16282497	15197546	1	683.527	0.926333	129955	0	1	1	1	1	1	1	0.996087	7.8918	2.74854
PCAN38	3095693983	22234	93134	93134	93134	93113	0.999775	9958682	9307535	1	418.617	0.927702	130129	0	1	1	0.996087	0.996087	0.996042	0.990825	0.954349	9.66505	3.39316
PCAN39	3095693983	22234	170077	170077	170077	170032	0.999735	18509721	17256449	1	776.129	0.925725	129805	0	1	1	1	1	1	1	1	6.74304	3.72013
PCAN40	3095693983	22234	120456	120456	120456	120433	0.999809	13389464	12491651	1	561.827	0.926573	129896	0	1	1	1	1	1	1	0.996087	6.71136	2.09407
PCAN41	3095693983	22234	71808	71808	71808	71790	0.999749	7850724	7336648	1	329.974	0.927955	130115	0	1	1	1	1	0.996087	0.996087	0.984573	7.74551	2.12175
PCAN42	3095693983	22234	116844	116844	116844	116802	0.999641	12749225	11855407	1	533.211	0.92251	129471	0	1	1	1	1	1	1	0.996087	8.00375	2.18159
PCAN44	3095693983	22234	214280	214280	214280	214227	0.999753	23482513	21927260	1	986.204	0.927059	130011	0	1	1	1	1	1	1	1	2.78552	6.58011
PCAN45	3095693983	22234	116186	116186	116186	116155	0.999733	12894818	12033678	1	541.229	0.927147	129934	0	1	1	1	1	1	1	0.999415	2.01891	7.84392
PCAN47	3095693983	22234	199017	199017	199017	198946	0.999643	21472379	19992614	1	899.191	0.920771	129637	0	1	1	1	1	1	1	1	4.10743	6.83844
PCAN48	3095693983	22234	120135	120135	120135	120102	0.999725	13297675	12475949	1	561.12	0.932513	130629	0	1	1	1	1	1	1	0.996087	5.19	4.04619
PCAN49	3095693983	22234	123678	123678	123678	123658	0.999838	13723807	12828764	1	576.989	0.927882	130152	0	1	1	1	1	1	1	0.996087	5.42045	4.13084
PCAN50	3095693983	22234	71672	71672	71672	71654	0.999749	7861202	7338078	1	330.039	0.927476	129967	0	1	1	1	1	1	1	0.987452	4.79391	4.62437
PCAN51	3095693983	22234	125886	125886	125886	125857	0.99977	13465637	12500946	1	562.245	0.8925	129258	0	1	1	1	1	1	0.997661	0.960286	6.23136	8.70023
PCAN52	3095693983	22234	118806	118806	118806	118767	0.999672	13184419	12442153	1	559.6	0.937643	131394	0	1	1	1	1	1	1	0.991185	4.65533	4.44522
PCAN53	3095693983	22234	116398	116398	116398	116367	0.999734	12834346	11927150	1	536.437	0.92128	129391	0	1	1	1	1	1	1	0.994243	3.89831	5.34494
PCAN54	3095693983	22234	73149	73149	73149	73130	0.99974	8107356	7596786	1	341.674	0.930924	130464	0	1	1	1	1	1	1	0.994108	2.9888	5.13398
PCAN55	3095693983	22234	62979	62979	62979	62961	0.999714	6872099	6410630	1	288.326	0.924548	129883	0	1	1	1	1	0.996087	0.990465	0.967257	8.65946	2.21165
PCAN56	3095693983	22234	62414	62414	62414	62383	0.999503	6943456	6483680	1	291.611	0.925892	130013	0	1	1	1	1	1	0.99919	0.985293	6.90593	1.98443
PCAN57	3095693983	22234	153840	153840	153840	153791	0.999681	16864545	15743937	1	708.102	0.92062	129981	0	1	1	1	1	1	1	0.996087	5.21281	3.39116
PCAN59	3095693983	22234	66579	66579	66579	66561	0.99973	7395012	6874009	1	309.167	0.922088	129423	0	1	1	1	1	1	0.996087	0.983584	5.90643	2.23337
PCAN60	3095693983	22234	137668	137668	137668	137618	0.999637	15299654	14316462	1	643.9	0.924872	130285	0	1	1	1	1	0.999955	0.996087	0.996087	6.667	2.38036
